# Supplementary material
Source: PubMed Central journal article supplement (PMC2592658)

Supplementary Figure 1. BIAcore sensorgrams of the interaction of the WT (A), T250Q/M428L (B) and H435A (C) Fcs with human and mouse FcRn at pH 6.0.

Sensorgrams for WT and T250Q/M428L display the response values for the average of three measurements at Fc concentrations of 0.0033  $\mu$ M to 4.0  $\mu$ M in black and the data fitted to the heterogenous binding model for each concentration in red. Sensorgrams for H434A display the response values for the average of three measurements at Fc a single concentration of 4.0  $\mu$ M in black. Affinity data were not calculated for H435AFc since RU at the highest Fc concentration were at the level of noise ( $\pm 2$  RU) for the Biacore 2000 system.

Supplementary Figure 2. BIAcore sensorgrams of the interaction of the WT (A), T250Q/M428L (B) and H435A (C) Fcs with human and mouse FcRn at pH 7.4.

Sensorgrams for each Fc display the response values for the average of three measurements at a single concentration of 50  $\mu$ M.

Supplementary Figure 3. BIAcore sensorgrams of the interaction of the WT (A) and T250Q/M428L (B) Fcs with human and mouse FcRn measuring dissociation at pH 7.4 after complexes were formed at pH 6.0. Studies were conducted at 25° C. Sensorgrams for WT and T250Q/M428L display the response values for binding and dissociation at Fc concentrations of 0.0033  $\mu$ M to 4.0  $\mu$ M. Arrows indicate dissociation phase at pH 7.4, and the values shown are for the rates of dissociation estimated at pH 7.4. Estimated  $k_{off}$  values for dissociation phase at pH 7.4 are: WT-MFcRn  $\sim 5$  sec; T250Q/M428L-HFcRn  $\sim 12$  sec, T250Q/M428L-MFcRn  $\sim 35$  sec, WT-hFcRn: too fast to estimate.

# Supplementary Figure 1

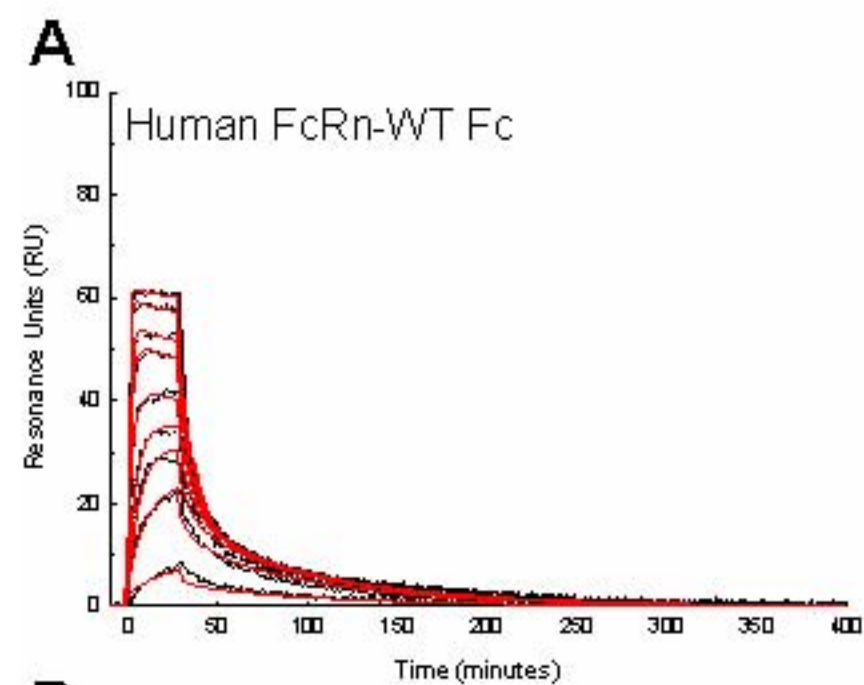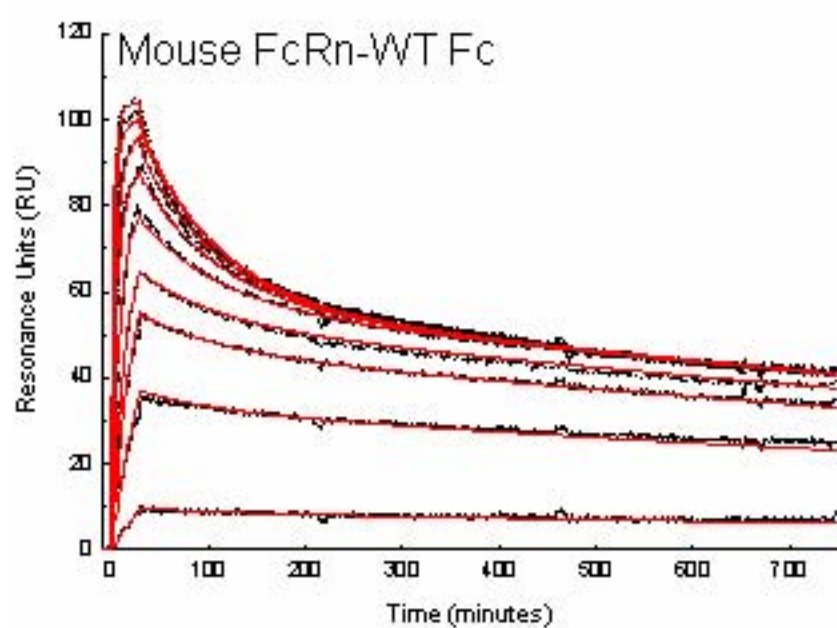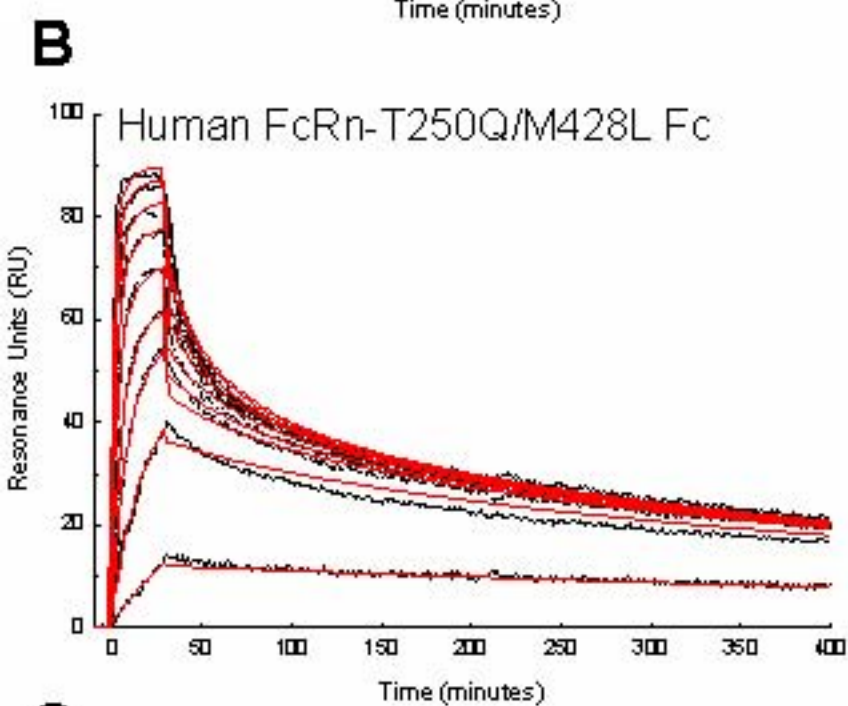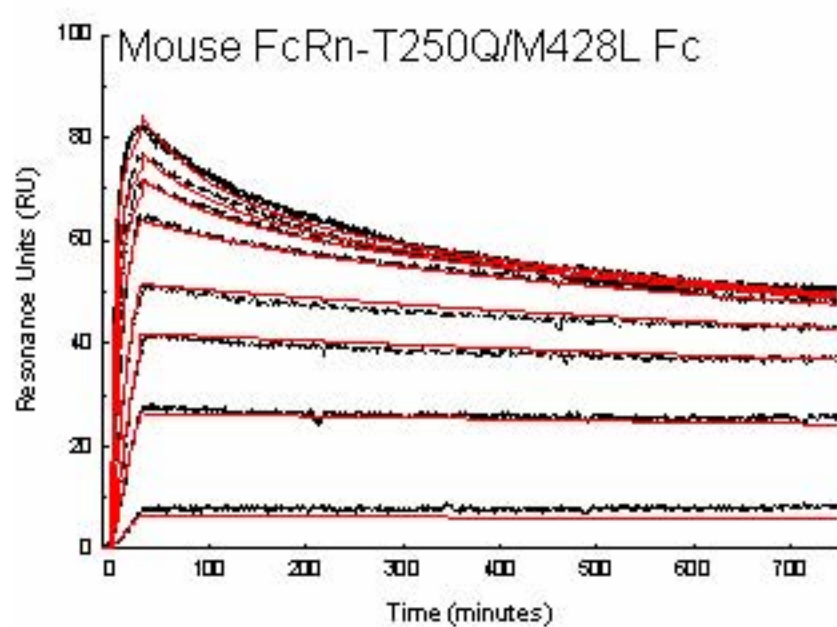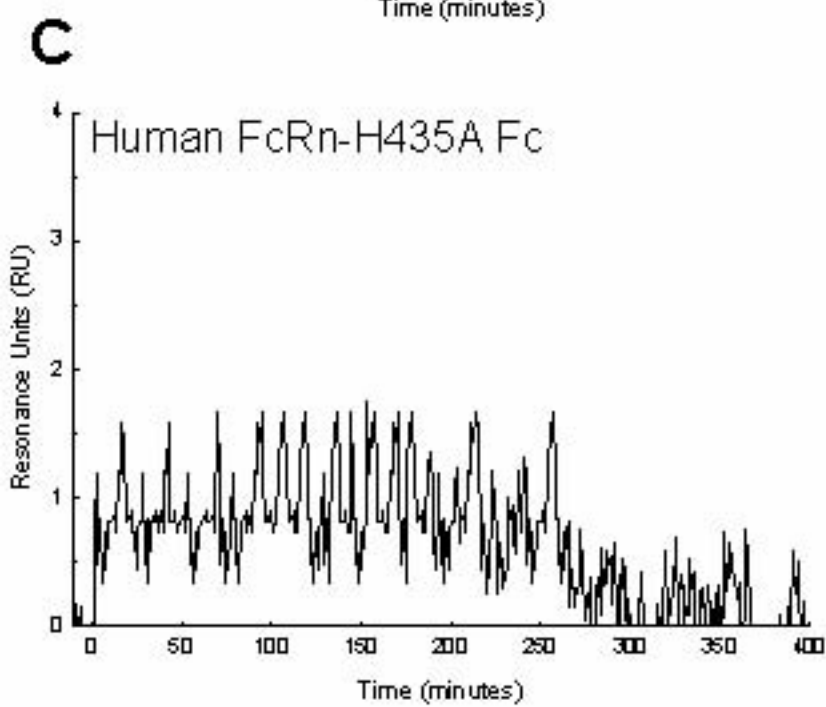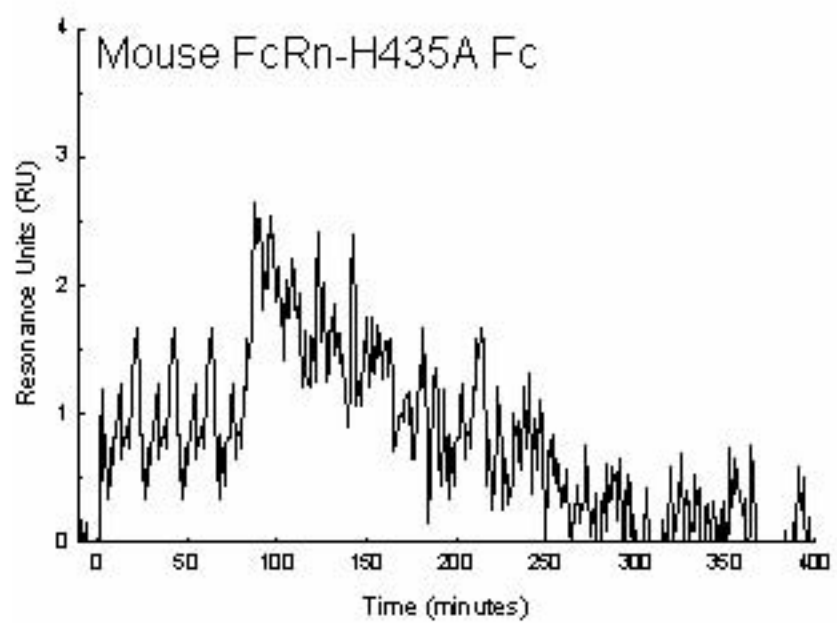

# Supplementary Figure 2

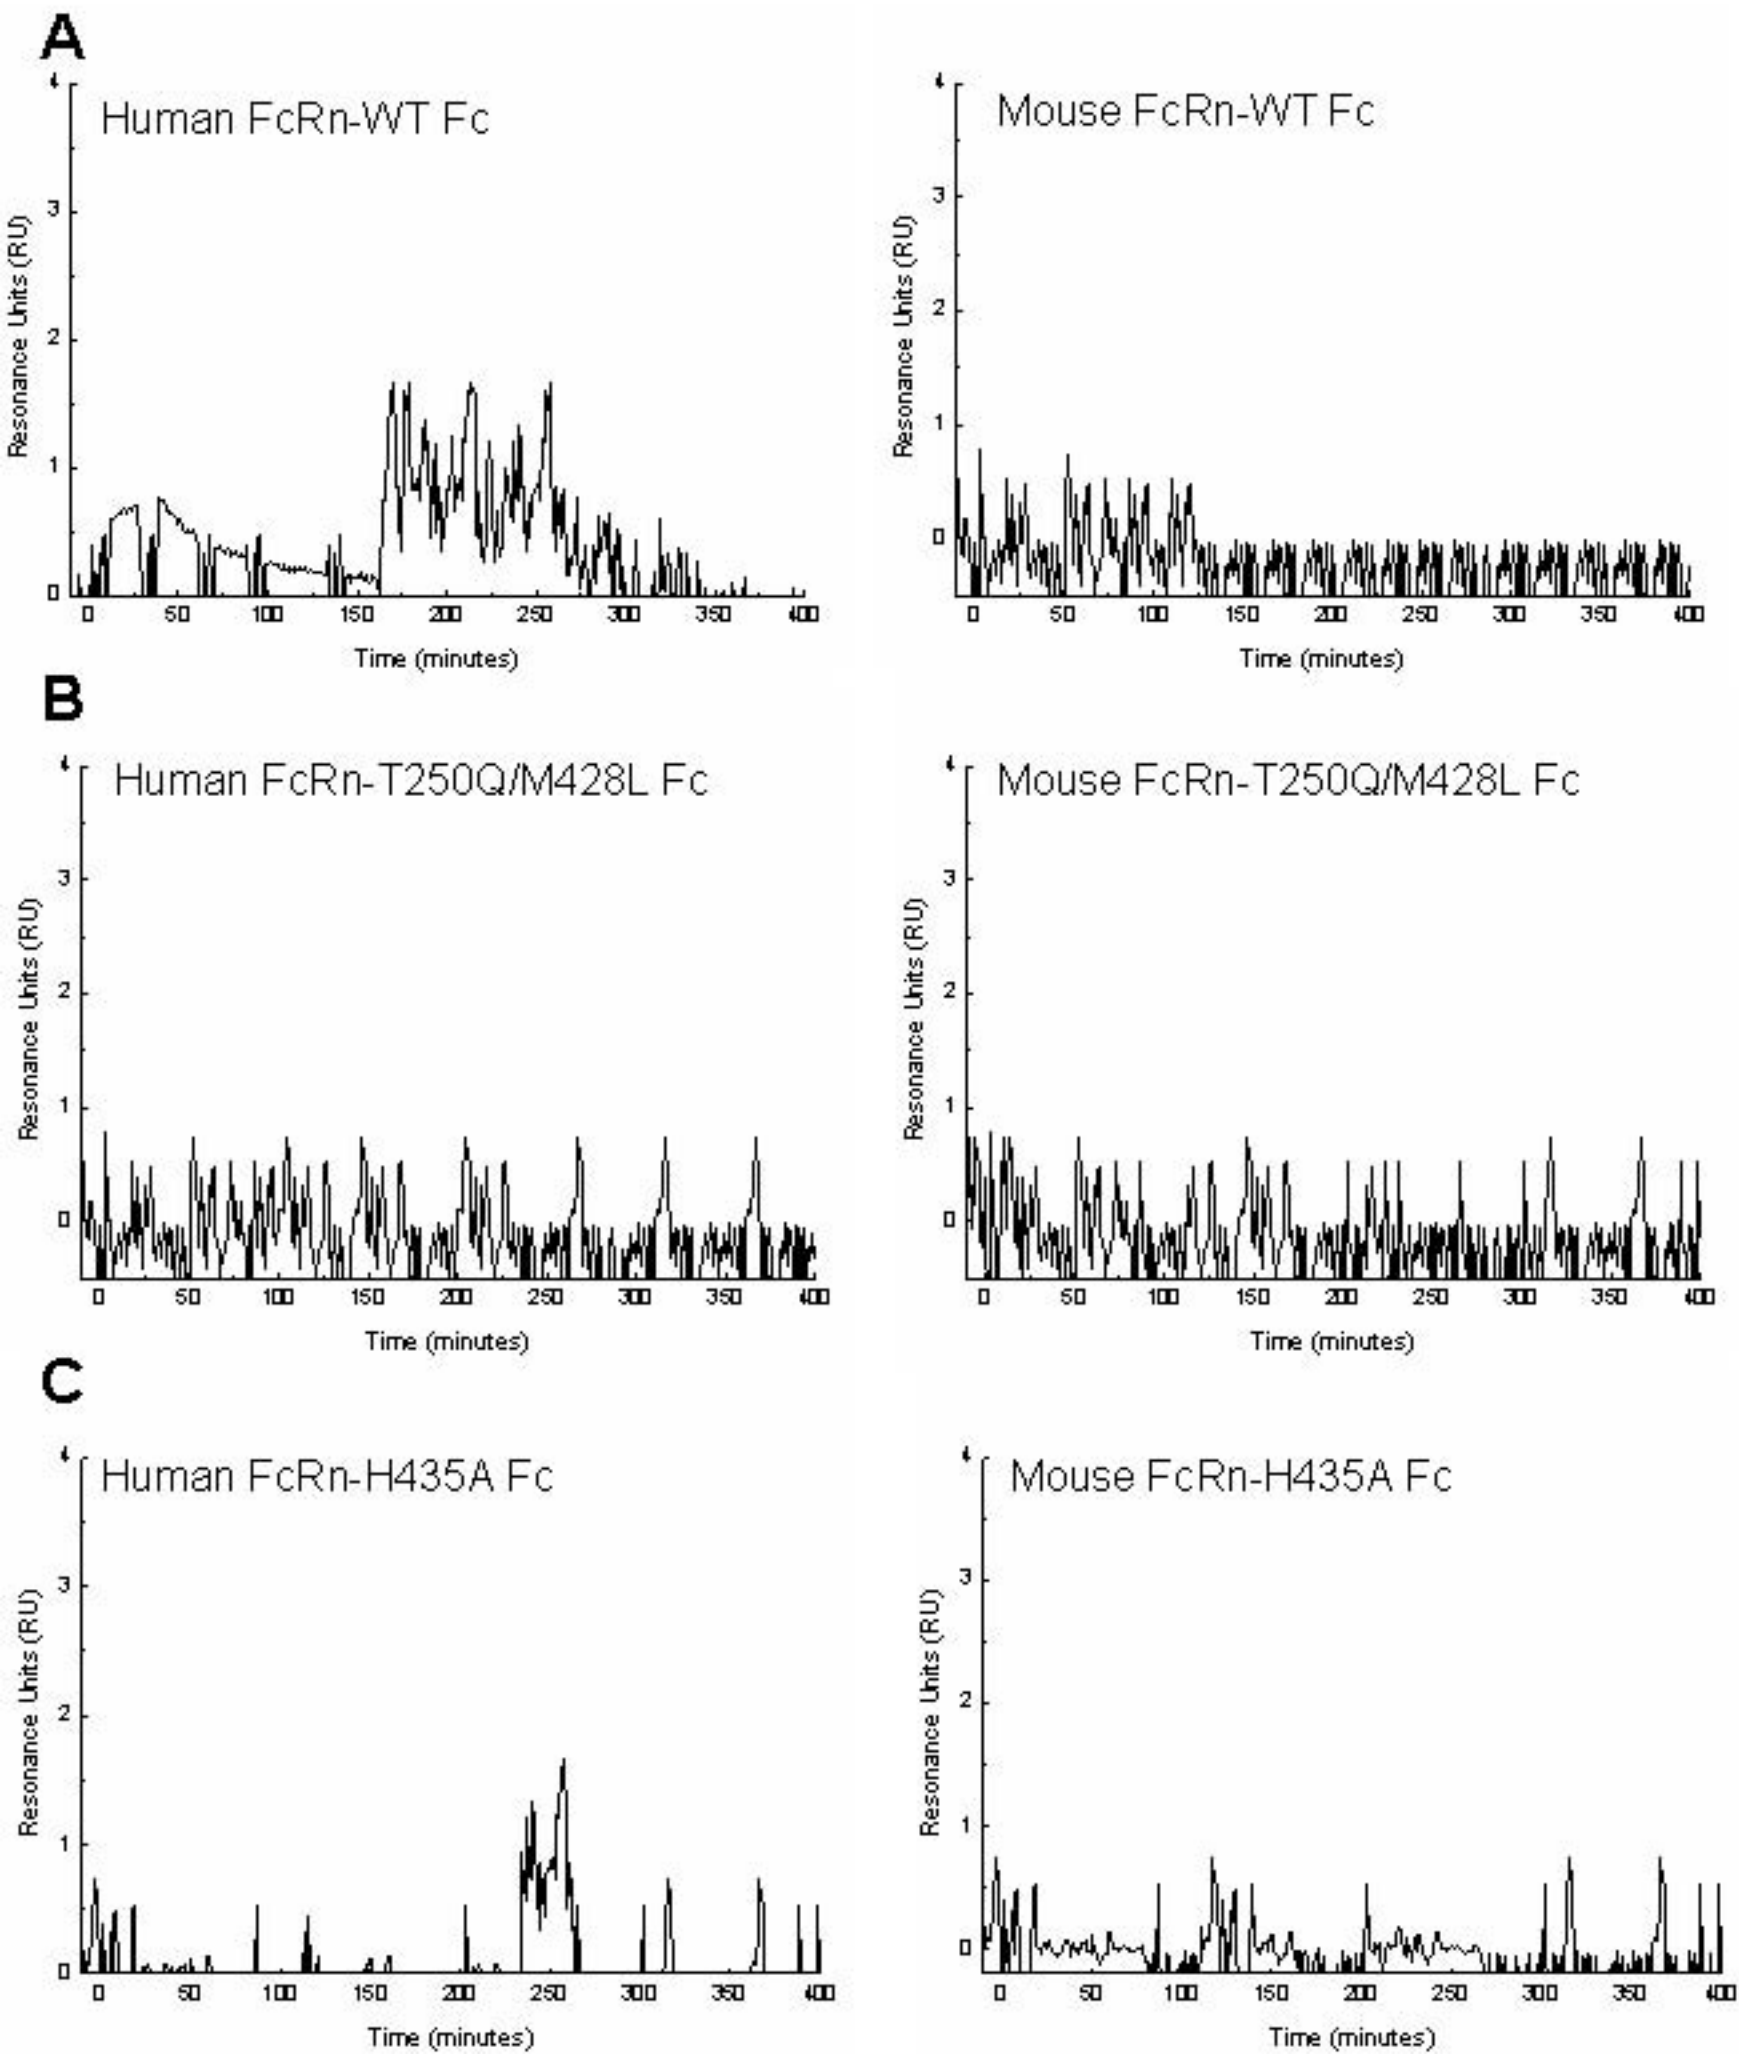

# Supplementary Figure 3

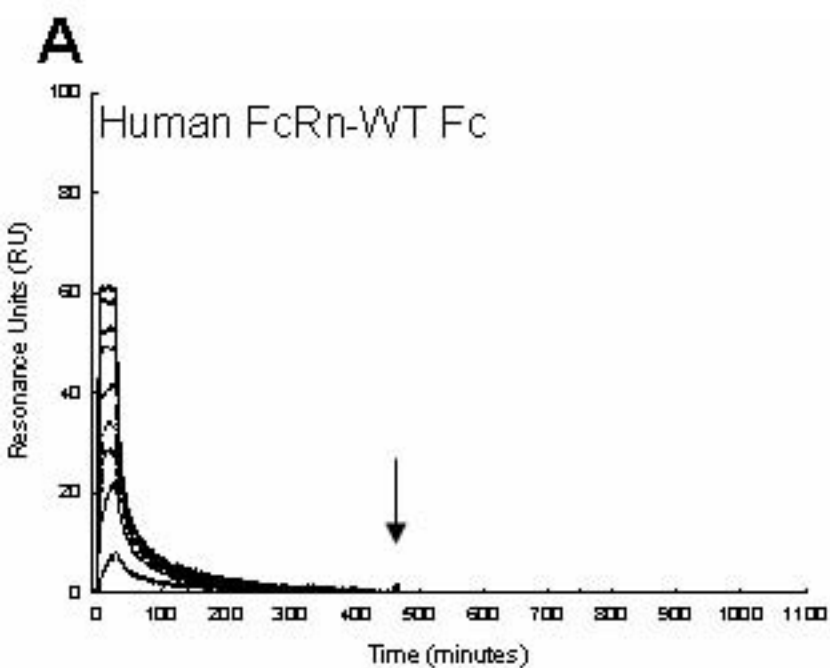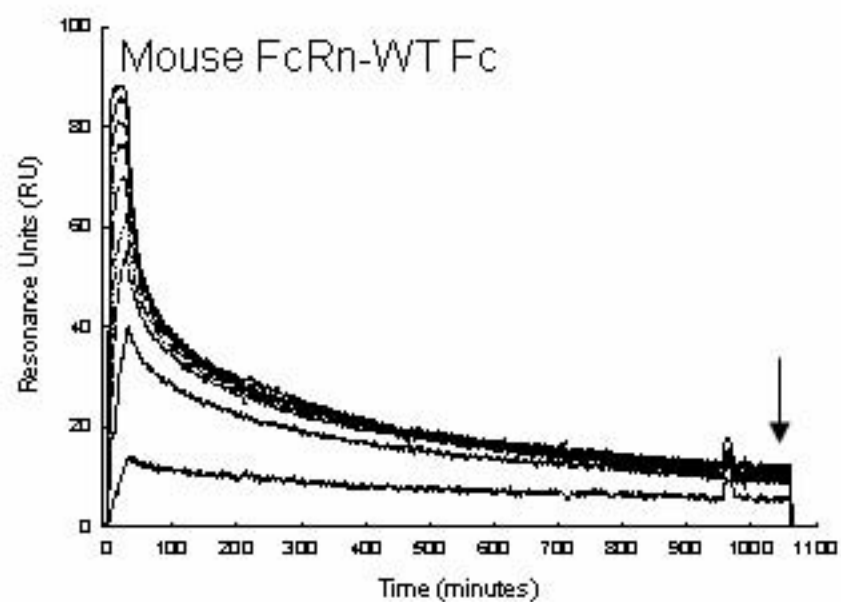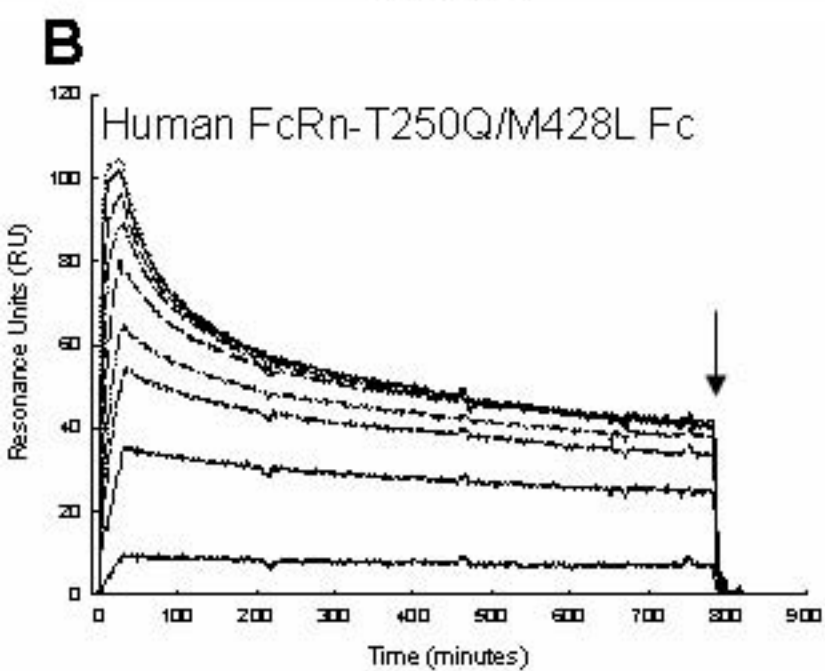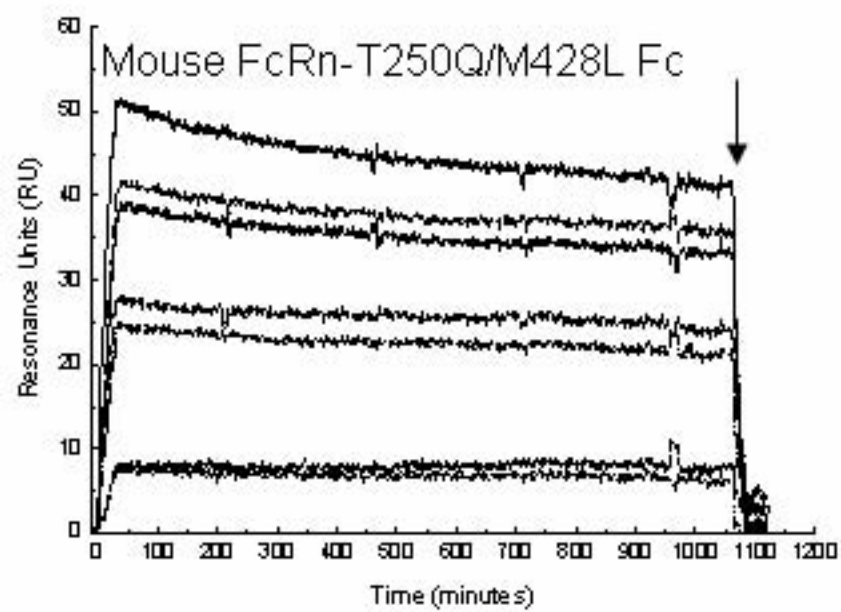

Supplement: E07-02-0101_1.pdf [file E07-02-0101_1.pdf]
